# Supplementary material for: Pathway trajectory analysis with tensor imputation reveals drug-induced single-cell transcriptomic landscape
Source: Nat Comput Sci. 2022 Nov 24;2(11):758–70. doi: 10.1038/s43588-022-00352-8 (PMC10768635; doi:10.1038/s43588-022-00352-8)
Supplement: Supplementary file 3 — Performance evaluation of data imputation [file 43588_2022_352_MOESM3_ESM.xlsx]

## Sheet: Sheet1
	Supplementary Data 1 | Performance evaluation of data imputation in the pancreatic islet dataset with different rates of artificial missing values. Relative standard errors (RSEs) between the observed and reconstructed data from tensor imputation were calculated for missing values only. MAGIC, SAVER, SAVER-X, scImpute, and kNN-smoothing are the baseline methods. Artificially generated missing rat…
		0.1								0.5								0.9
		MAGIC	SAVER	SAVER-X	scImpute	kNN-smoothing	TIGERS			MAGIC	SAVER	SAVER-X	scImpute	kNN-smoothing	TIGERS			MAGIC	SAVER	SAVER-X	scImpute	kNN-smoothing	TIGERS
							CP	TT							CP	TT							CP	TT
	Beta	1.67	1.854	1.849	2.328	1.764	0.523	0.484		2.168	2.557	2.54	2.533	1.357	0.513	0.483		3.768	4.113	4.133	2.233	0.893	0.53	0.533
	Alpha	1.928	2.045	2.085	2.609	1.867	0.537	0.492		2.501	2.83	2.802	2.726	1.421	0.536	0.494		4.203	4.517	4.535	2.31	0.915	0.545	0.566
	Ductal	1.848	2.006	2.039	2.624	1.902	0.518	0.473		2.426	2.871	2.83	2.855	1.452	0.512	0.478		4.336	4.614	4.715	2.357	0.905	0.544	0.532
	Endocrine	1.564	1.997	1.972	2.154	1.66	0.632	0.547		2.044	2.68	2.603	2.334	1.286	0.618	0.555		3.672	4.043	4.162	1.458	0.93	0.649	0.732
	Acinar	1.814	2	2.005	2.341	1.697	0.506	0.435		2.338	2.752	2.736	2.487	1.303	0.479	0.444		4.104	4.258	4.459	1.938	0.866	0.615	0.553
	Endothelial2	1.435	1.72	1.699	1.915	1.769	0.513	0.447		1.92	2.426	2.375	2.085	1.371	0.484	0.454		3.536	3.902	4.053	2.171	0.863	0.563	0.579
	Gamma	2.213	2.311	2.26	2.577	1.887	0.551	0.508		2.786	3.02	3.091	2.712	1.451	0.561	0.53		4.534	4.675	4.823	2.275	0.914	0.894	0.669
	SI_human	1.909	2.11	2.125	2.523	1.916	0.485	0.45		2.522	2.863	2.948	2.672	1.433	0.491	0.472		4.219	4.534	4.627	2.263	0.864	0.791	0.585
	Delta	2.175	2.215	2.22	2.606	1.816	0.53	0.474		2.733	2.919	3.029	2.638	1.395	0.499	0.486		4.416	4.669	4.666	2.156	0.879	0.721	0.667
	11	2.127	2.569	2.483	2.556	1.885	0.505	0.488		2.74	3.166	3.342	2.65	1.388	0.642	0.525		4.663	4.982	5.025	1.493	0.934	0.65	0.873
	7	1.87	2.436	2.356	2.279	1.816	0.561	0.565		2.418	3.046	3.193	2.431	1.397	0.592	0.649		3.847	4.283	4.794	1.497	0.944	0.875	0.949
	Endothelial1	2.41	2.969	3.119	2.736	1.965	0.55	0.539		3.002	3.513	3.916	2.732	1.456	0.561	0.591		4.246	4.663	5.036	1.045	0.956	0.945	0.83
	SI_mouse	1.944	2.103	2.146	2.063	1.637	0.527	0.588		2.165	2.552	2.6	1.975	1.244	0.55	0.61		2.844	3.387	3.951	1.351	0.863	0.847	1.05
	Acinar_like	2.641	2.972	3.047	2.421	1.936	0.631	0.709		2.988	3.925	3.522	2.278	1.485	0.664	0.85		3.483	4.117	4.716	1.187	0.986	1.29	1.12
